# Supplementary material for: A highly conductive fibre network enables centimetre-scale electron transport in multicellular cable bacteria
Source: PubMed Central journal article supplement (PMC6739318; doi:10.1038/s41467-019-12115-7), 2019-09-11
Supplement: 41467_2019_12115_MOESM1_ESM.pdf [file 41467_2019_12115_MOESM1_ESM.pdf]

## **Supplementary information**

A highly conductive fibre network enables centimetre-scale electron transport in multicellular cable bacteria

**Meysman et al.**

### Supplementary figure 1

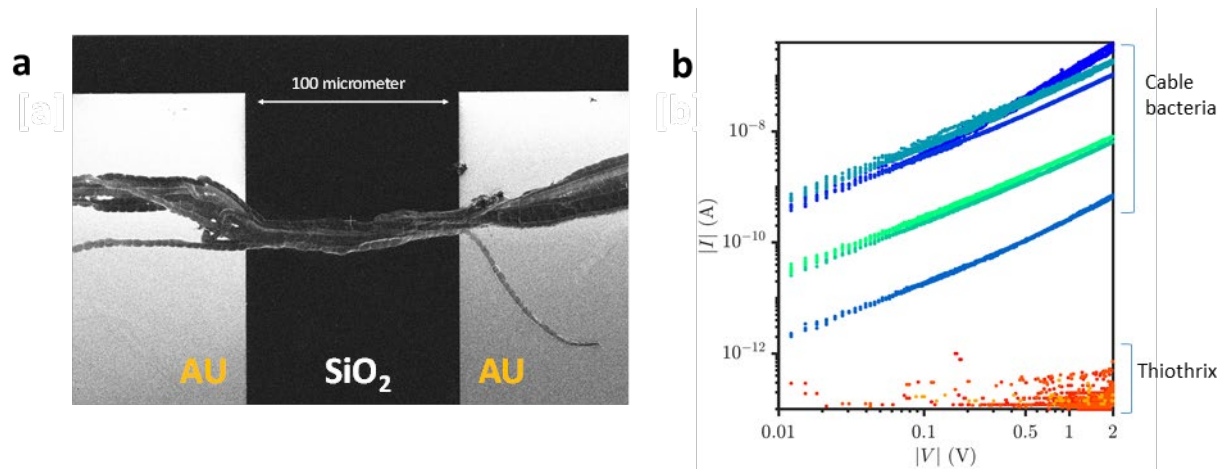

**Supplementary figure 1.** Current measurements on bundles of filamentous bacteria. **a** SEM image (800x) of a bundle of cable bacterium filaments deposited on SiO<sub>2</sub> substrate with Au contact pads. Imaging was conducted with a Focused Ion Beam-Scanning Electron Microscope (FEI Helios G4 CX Dual Beam). The electron beam was operated at 30 kV. **b** comparison of current-voltage profiles for 6 filament bundles of cable bacteria versus 6 filament bundles of the non-conductive bacterium *Thiofilum flexile* (each bundle contains n=5-20 filaments).



|    | Contact   | $\Delta x$        | $I_{\max}$  | $I_{\text{norm}}$ | $R$               |
|----|-----------|-------------------|-------------|-------------------|-------------------|
|    | surface   | [ $\mu\text{m}$ ] | [pA]        | [pA]              | [ $10^6 \Omega$ ] |
| 1  | Sn        | 600               | 30          | 60                | 3333              |
| 2  | Sn        | 600               | 30          | 60                | 3333              |
| 3  | Sn        | 600               | 150         | 300               | 667               |
| 4  | Sn        | 600               | 0           | 0                 | Inf               |
| 5  | Sn        | 600               | 70          | 140               | 1429              |
| 6  | Sn        | 600               | 75          | 150               | 1333              |
| 7  | Sn        | 600               | 90          | 180               | 1111              |
| 8  | Sn        | 600               | 910         | 1820              | 110               |
| 9  | Sn        | 600               | 75          | 150               | 1333              |
| 10 | Sn        | 600               | 60          | 120               | 1667              |
| 11 | Sn        | 600               | 773         | 1546              | 129               |
| 12 | Sn        | 600               | 124         | 248               | 806               |
| 13 | Sn        | 600               | 80          | 160               | 1250              |
| 14 | Sn        | 600               | 390         | 780               | 256               |
| 15 | Sn        | 600               | 0           | 0                 | Inf               |
| 16 | Sn        | 600               | 0           | 0                 | Inf               |
| 17 | Sn        | 600               | 75          | 150               | 1333              |
| 18 | Sn        | 600               | 0           | 0                 | Inf               |
| 19 | Sn        | 600               | 0           | 0                 | Inf               |
| 20 | Sn        | 600               | 170         | 340               | 588               |
| 21 | Sn        | 600               | 177         | 354               | 565               |
| 22 | Sn        | 600               | 170         | 340               | 588               |
| 23 | Sn        | 600               | 150         | 300               | 667               |
| 24 | Sn        | 600               | 0           | 0                 | Inf               |
| 25 | Sn        | 600               | 6           | 12                | 16667             |
| 26 | Sn        | 600               | 0           | 0                 | Inf               |
| 27 | Au        | 600               | 0           | 0                 | Inf               |
| 28 | <b>Au</b> | <b>600</b>        | <b>1350</b> | <b>2700</b>       | <b>74</b>         |
| 29 | Au        | 600               | 119         | 238               | 840               |
| 30 | Au        | 300               | 200         | 200               | 501               |
| 31 | Au        | 300               | 194         | 194               | 517               |
| 32 | Au        | 300               | 0           | 0                 | Inf               |
| 33 | Au        | 300               | 0           | 0                 | Inf               |
| 34 | Au        | 300               | 81          | 81                | 1242              |
| 35 | Au        | 600               | 0           | 0                 | Inf               |
| 36 | Au        | 600               | 0           | 0                 | Inf               |
| 37 | Au        | 600               | 0           | 0                 | Inf               |
| 38 | Au        | 300               | 0           | 0                 | Inf               |
| 39 | Au        | 300               | 377         | 377               | 266               |
| 40 | Au        | 300               | 470         | 470               | 213               |
| 41 | Au        | 300               | 994         | 994               | 101               |
| 42 | Au        | 300               | 805         | 805               | 124               |
| 43 | Au        | 300               | 39          | 39                | 2597              |
| 44 | Au        | 300               | 16          | 16                | 6452              |
| 45 | Au        | 300               | 177         | 177               | 567               |
| 46 | Au        | 400               | 1245        | 1659              | 80                |
| 47 | Au        | 400               | 849         | 1131              | 118               |

**Supplementary Table 1.** Amperometric measurements performed at constant voltage bias on intact filaments of cable bacteria under ambient air at room temperature.  $\Delta x$  = distance between electrode contact pads;  $I_{\max}$  = maximal current measured through an individual filament at a bias  $\Delta V = +0.1$  V. Normalized current  $I_{\text{norm}} = I_{\max} (\Delta x / \Delta x_{\text{ref}})$  with  $\Delta x_{\text{ref}} = 300 \mu\text{m}$ . Resistance  $R = \Delta V / I_{\max}$ . Cell resistance  $R_{\text{cell}} = R (L_{\text{cell}} / \Delta x)$  with  $L_{\text{cell}} = 4.95 \mu\text{m}$  the mean length of an individual cell in a cable bacterium filament. Each row in the table represents a measurement on a different individual filament. The measurement with highest conductivity value is indicated in bold.

|           | Electrode contact | $\Delta x$<br>[ $\mu\text{m}$ ] | $R$<br>[ $10^6 \Omega$ ] | $R_{\text{cell}}$<br>[ $10^3 \Omega$ ] | $I_{\text{norm}}$<br>[nA] | $\sigma_F$<br>[ $\text{S cm}^{-1}$ ] |
|-----------|-------------------|---------------------------------|--------------------------|----------------------------------------|---------------------------|--------------------------------------|
| 1         | CP                | 230                             | 10.6                     | 114                                    | 14.5                      | 3.82                                 |
| 2         | CP                | 66                              | 1.0                      | 24                                     | 68.2                      | 18.0                                 |
| 3         | CP                | 180                             | 3.6                      | 100                                    | 16.6                      | 4.36                                 |
| 4         | CP                | 700                             | 399                      | 2822                                   | 0.6                       | 0.15                                 |
| 5         | CP                | 460                             | 267                      | 2874                                   | 0.6                       | 0.15                                 |
| 6         | CP                | 150                             | 3.8                      | 126                                    | 13.0                      | 3.43                                 |
| 7         | Au. CP            | 450                             | 40                       | 440                                    | 3.7                       | 0.99                                 |
| 8         | Au. CP            | 450                             | 25                       | 269                                    | 6.1                       | 1.61                                 |
| 9         | Au. CP            | 450                             | 32                       | 350                                    | 4.7                       | 1.24                                 |
| <b>10</b> | <b>CP</b>         | <b>2700</b>                     | <b>3.0</b>               | <b>5</b>                               | <b>302</b>                | <b>79.4</b>                          |
| 11        | CP                | 7050                            | 42000                    | 29500                                  | 0.1                       | 0.01                                 |
| 12        | CP                | 4140                            | 12450                    | 14886                                  | 0.1                       | 0.03                                 |
| 13        | CP                | 83                              | 5.8                      | 343                                    | 4.8                       | 1.27                                 |
| 14        | CP                | 223                             | 33                       | 728                                    | 2.3                       | 0.60                                 |
| 15        | CP                | 3500                            | 58                       | 82                                     | 20.2                      | 5.31                                 |
| 16        | CP                | 5734                            | 30800                    | 26597                                  | 0.1                       | 0.02                                 |
| 17        | CP                | 3500                            | 386                      | 546                                    | 3.0                       | 0.80                                 |
| 18        | CP                | 8000                            | 5870                     | 3634                                   | 0.5                       | 0.12                                 |
| 19        | CP                | 8500                            | 25380                    | 14779                                  | 0.1                       | 0.03                                 |
| 20        | CP                | 9700                            | 98000                    | 2521                                   | 0.7                       | 0.17                                 |
| 21        | Au. CP            | 450                             | 132                      | 1446                                   | 1.1                       | 0.30                                 |
| 22        | Au. CP            | 1350                            | 1110                     | 4070                                   | 0.4                       | 0.11                                 |
| 23        | Au. CP            | 1800                            | 1340                     | 3684                                   | 0.4                       | 0.12                                 |
| 24        | Au. CP            | 900                             | 868                      | 4776                                   | 0.3                       | 0.09                                 |
| 25        | CP                | 650                             | 29                       | 217                                    | 7.6                       | 2.00                                 |
| 26        | CP                | 580                             | 8.9                      | 76                                     | 21.8                      | 5.73                                 |
| 27        | CP                | 300                             | 104                      | 1707                                   | 1.0                       | 0.25                                 |
| 28        | CP                | 250                             | 1.9                      | 37                                     | 44.1                      | 11.6                                 |
| 29        | CP                | 250                             | 6.5                      | 128                                    | 12.8                      | 3.38                                 |
| 30        | CP                | 400                             | 640                      | 7916                                   | 0.2                       | 0.05                                 |
| 31        | CP                | 520                             | 354                      | 3365                                   | 0.5                       | 0.13                                 |
| 32        | CP                | 540                             | 15                       | 141                                    | 11.7                      | 3.08                                 |

**Supplementary Table 2.** Current ( $I$ )/Voltage ( $V$ ) measurements performed on intact filaments of cable bacteria under  $\text{N}_2$  atmosphere.  $\Delta x$  = distance between electrode contact pads;  $R$  = Resistance (calculated by linear fitting of  $I/V$  curve at the origin). The cell resistance  $R_{\text{cell}} = R (L_{\text{cell}} / \Delta x)$  with  $L_{\text{cell}} = 4.95 \mu\text{m}$  the mean length of an individual cell in a cable bacterium filament. The normalized current is calculated as  $I_{\text{norm}} = (\Delta V / R) * (\Delta x / \Delta x_{\text{ref}})$  with  $\Delta V = 0.1 \text{ V}$  and  $\Delta x_{\text{ref}} = 300 \mu\text{m}$ .  $\sigma_F$  = electrical conductivity through a periplasmic fibre calculated as  $\sigma_F = \Delta x / (R N_F A_F)$  where  $N_F = 60$  is the number of fibres per filament and  $A_F = \pi d_F^2 / 4$  is the cross-sectional area of a fibre with mean diameter  $d_F = 50 \text{ nm}$ . Au = gold electrode contact. CP = carbon paste. Each row in the table represents a measurement on a different individual filament. The measurement with highest conductivity value is indicated in bold.

|           | <b>Electrode contact</b> | <b>Atmosphere</b> | <b>Measurement type</b> | <b><math>\Delta x</math><br/>[<math>\mu\text{m}</math>]</b> | <b><math>R</math><br/>[<math>10^6 \Omega</math>]</b> | <b><math>I_{\text{norm}}</math><br/>[nA]</b> | <b><math>\sigma_F</math><br/>[S <math>\text{cm}^{-1}</math>]</b> |
|-----------|--------------------------|-------------------|-------------------------|-------------------------------------------------------------|------------------------------------------------------|----------------------------------------------|------------------------------------------------------------------|
| 1         | Au + CP                  | N <sub>2</sub>    | 2 probe                 | 450                                                         | 3.4                                                  | 29                                           | 11.5                                                             |
| 2         | Au + CP                  | N <sub>2</sub>    | 2 probe                 | 450                                                         | 408                                                  | 0.4                                          | 0.10                                                             |
| 3         | Au + CP                  | N <sub>2</sub>    | 2 probe                 | 450                                                         | 22.2                                                 | 6.8                                          | 1.78                                                             |
| 4         | Au + CP                  | N <sub>2</sub>    | 2 probe                 | 450                                                         | 27.6                                                 | 5.4                                          | 1.43                                                             |
| 5         | Au + CP                  | N <sub>2</sub>    | 2 probe                 | 450                                                         | 550                                                  | 0.3                                          | 0.07                                                             |
| 6         | Au                       | vacuum            | 4 probe                 | 100                                                         | 10.0                                                 | 3.3                                          | 0.88                                                             |
| 7         | Au                       | vacuum            | 4 probe                 | 100                                                         | 7.0                                                  | 4.8                                          | 1.25                                                             |
| 8         | Au                       | vacuum            | 4 probe                 | 100                                                         | 6.0                                                  | 5.6                                          | 1.46                                                             |
| 9         | Au                       | vacuum            | 4 probe                 | 100                                                         | 8.0                                                  | 4.2                                          | 1.10                                                             |
| 10        | Au                       | vacuum            | 4 probe                 | 100                                                         | 5.0                                                  | 6.7                                          | 1.75                                                             |
| 11        | Au                       | vacuum            | 4 probe                 | 100                                                         | 6.0                                                  | 5.6                                          | 1.46                                                             |
| 12        | Au                       | vacuum            | 4 probe                 | 100                                                         | 12.0                                                 | 2.8                                          | 0.73                                                             |
| 13        | Au                       | vacuum            | 4 probe                 | 100                                                         | 28.0                                                 | 1.2                                          | 0.31                                                             |
| 14        | Au                       | vacuum            | 4 probe                 | 100                                                         | 8.0                                                  | 4.2                                          | 1.10                                                             |
| 15        | Cu + CP                  | air               | 2 probe                 | 1600                                                        | 125                                                  | 4.3                                          | 1.12                                                             |
| 16        | Cu + CP                  | air               | 2 probe                 | 2100                                                        | 9.7                                                  | 72                                           | 19.0                                                             |
| 17        | Cu + CP                  | air               | 2 probe                 | 950                                                         | 278                                                  | 1.1                                          | 0.30                                                             |
| 18        | Cu + CP                  | air               | 2 probe                 | 930                                                         | 7.4                                                  | 42                                           | 11.0                                                             |
| 19        | Cu + CP                  | air               | 2 probe                 | 3170                                                        | 18.5                                                 | 57                                           | 15.0                                                             |
| 20        | Cu + CP                  | air               | 2 probe                 | 2180                                                        | 286                                                  | 2.5                                          | 0.67                                                             |
| 21        | Cu + CP                  | air               | 2 probe                 | 1970                                                        | 21.7                                                 | 30                                           | 7.95                                                             |
| 22        | Cu + CP                  | air               | 2 probe                 | 3070                                                        | 23.8                                                 | 43                                           | 11.3                                                             |
| 23        | Cu + CP                  | air               | 2 probe                 | 2720                                                        | 111                                                  | 8.2                                          | 2.15                                                             |
| 24        | Cu + CP                  | air               | 2 probe                 | 2050                                                        | 1250                                                 | 0.5                                          | 0.14                                                             |
| 25        | Cu + CP                  | air               | 2 probe                 | 910                                                         | 8.3                                                  | 36                                           | 9.58                                                             |
| 26        | Cu + CP                  | air               | 2 probe                 | 2450                                                        | 50                                                   | 16                                           | 4.30                                                             |
| <b>27</b> | <b>Cu + CP</b>           | <b>air</b>        | <b>2 probe</b>          | <b>820</b>                                                  | <b>3.6</b>                                           | <b>77</b>                                    | <b>20.1</b>                                                      |
| 28        | Cu + CP                  | air               | 2 probe                 | 1250                                                        | 1250                                                 | 0.3                                          | 0.09                                                             |

**Supplementary Table 3.** Current ( $I$ )/Voltage ( $V$ ) measurements performed on periplasmic fibre sheaths of cable bacteria.  $\Delta x$  = distance between electrode contact pads;  $R$  = Resistance (calculated by linear fitting of  $I/V$  curve at the origin).  $\sigma_F$  = electrical conductivity through a periplasmic fibre calculated as  $\sigma_F = \Delta x / (R N_F A_F)$  where  $N_F = 60$  is the number of fibres per filament and  $A_F = \pi d_F^2 / 4$  is the cross-sectional area of a fibre with mean diameter  $d_F = 50$  nm. Au, Cu = gold or copper electrode contact. CP = carbon paste. Each row in the table represents a measurement on a different individual filament, except for rows 6-14, which represent separate 100  $\mu\text{m}$  sections of the same filament. The measurement with highest conductivity value is indicated in bold.
