# Supplementary material for: A highly conductive fibre network enables centimetre-scale electron transport in multicellular cable bacteria
Source: PubMed Central journal article supplement (PMC6739318; doi:10.1038/s41467-019-12115-7), 2019-09-11
Supplement: 41467_2019_12115_MOESM3_ESM.pdf [file 41467_2019_12115_MOESM3_ESM.pdf]

### **Description of Additional Supplementary Files**

File Name: Supplementary Movie 1

Description: Cable bacteria cutting stops the current. A cable bacterium filament is suspended in air between two metal electrodes, and a voltage difference is imposed. The filament is cut with a scalpel knife, and this immediately halts the current, thus demonstrating that the filaments is effectively guiding the current.
